# 1 Analytical kinetic model of native tandem promoters 2 in *E. coli*

3 Vatsala Chauhan<sup>1¶</sup>, Mohamed N.M. Bahrudeen<sup>1¶</sup>, Cristina S.D. Palma<sup>1</sup>, Ines S.C. Baptista<sup>1</sup>, Bilena L.B.  
4 Almeida<sup>1</sup>, Suchintak Dash<sup>1</sup>, Vinodh Kandavalli<sup>2</sup>, and Andre S. Ribeiro<sup>1\*</sup>

5  
6 <sup>1</sup> Laboratory of Biosystem Dynamics, Faculty of Medicine and Health Technology, Tampere  
7 University, Finland.

8 <sup>2</sup> Department of Cell and Molecular Biology, Uppsala University, Uppsala, Sweden.

9 \* Corresponding author. E-mail: [andre.sanchesribeiro@tuni.fi](mailto:andre.sanchesribeiro@tuni.fi)

10 ¶ These authors contributed equally to this work.

## 11 Abstract

12 Closely spaced promoters in tandem formation are abundant in bacteria. We investigated the evolutionary  
13 conservation, biological functions, and the RNA and single-cell protein expression of genes regulated by  
14 tandem promoters in *E. coli*. We also studied the sequence (distance between transcription start sites ' $d_{TSS}$ ',  
15 pause sequences, and distances from oriC) and potential influence of the input transcription factors of these  
16 promoters. From this, we propose an analytical model of gene expression based on measured expression  
17 dynamics, where RNAP-promoter occupancy times and  $d_{TSS}$  are the key regulators of transcription  
18 interference due to TSS occlusion by RNAP at one of the promoters (when  $d_{TSS} \leq 35$  bp) and RNAP  
19 occupancy of the downstream promoter (when  $d_{TSS} > 35$  bp). Occlusion and downstream promoter  
20 occupancy are modeled as linear functions of occupancy time, while the influence of  $d_{TSS}$  is implemented  
21 by a continuous step function, fit to *in vivo* data on mean single-cell protein numbers of 30 natural genes  
22 controlled by tandem promoters. The best-fitting step is at 35 bp, matching the length of DNA occupied by  
23 RNAP in the open complex formation. This model accurately predicts the squared coefficient of variation  
24 and skewness of the natural single-cell protein numbers as a function of  $d_{TSS}$ . Additional predictions suggest  
25 that promoters in tandem formation can cover a wide range of transcription dynamics within realistic  
26 intervals of parameter values. By accurately capturing the dynamics of these promoters, this model can be  
27 helpful to predict the dynamics of new promoters and contribute to the expansion of the repertoire of  
28 expression dynamics available to synthetic genetic constructs.

## 29 Author Summary

30 Tandem promoters are common in nature, but investigations on their dynamics have so far largely relied  
31 on synthetic constructs. Thus, their regulation and potentially unique dynamics remain unexplored. We first

32 performed a comprehensive exploration of the conservation of genes regulated by these promoters in *E.*  
33 *coli* and the properties of their input transcription factors. We then measured protein and RNA levels  
34 expressed by 30 *Escherichia coli* tandem promoters, to establish an analytical model of the expression  
35 dynamics of genes controlled by such promoters. We show that start site occlusion and downstream RNAP  
36 occupancy can be realistically captured by a model with RNAP binding affinity, the time length of open  
37 complex formation, and the nucleotide distance between transcription start sites. This study contributes to  
38 a better understanding of the unique dynamics tandem promoters can bring to the dynamics of gene  
39 networks and will assist in their use in synthetic genetic circuits.

## 40 Introduction

41 Closely spaced promoters exist in all branches of life in convergent, divergent, and tandem formations [1-  
42 7]. Models of tandem promoters [8-10] have largely been based on measurements of synthetic constructs  
43 [11-13] and predict that such promoter arrangements result in unique transcription dynamics due to the  
44 interference between RNAPs transcribing the promoters [9, 10, 14-19].

45 When an RNAP is committed to form the open complex (OC), a process lasting up to hundreds of seconds  
46 [20-22], it occupies approximately 35 base pairs (bp), from the transcription start site (TSS, position 0) until  
47 position -35 [23- 25]. If the TSS of a neighbouring promoter is closer than 35 bp away, it will not be possible  
48 for both promoters to be occupied simultaneously, since an RNAP occupying one of them will 'occlude' the  
49 other, preventing it from being reached [9]. However, if the promoters are more than 35 bp apart, this  
50 occlusion does not occur. Instead, interference will occur when RNAPs elongating from the upstream  
51 promoter collide with an RNAP occupying the downstream promoter [14] (in either closed or open complex  
52 formation), forcing one of the RNAPs to fall-off (both scenarios are likely possible, and we expect it to differ  
53 with, e.g., the binding affinity of the RNAP to the downstream promoter). Meanwhile, models based on  
54 empirical parameter values suggest that collisions between two elongating RNAPs are rare (because  
55 events such as pausing or simultaneous initiations from both promoters are rare). Also, even if and when  
56 such collisions occur, they are unlikely to result in fall-offs since the RNAPs are moving at similar speeds  
57 and in the same direction [9][10][26].

58 Models suggest that both forms of interference decrease the mean RNA production rate while increasing  
59 its noise based on the distance between promoters ( $d_{TSS}$ ), their strengths [10], and the time spent between  
60 commitment of the RNAP to OC and escape from the promoter region [27]. These hypotheses have yet to  
61 be empirically validated in natural tandem promoters.

62 We studied how  $d_{TSS}$  and the time spent by RNAPs on the TSSs affect gene expression dynamics due to  
63 interference between the transcription processes of tandem promoters (Fig 1). We consider only the natural  
64 tandem promoters that neither overlap with nor have in between another gene (positionings I and II, which  
65 differ in if the promoter regions overlap or not) (see the other arrangements in Fig. S1 in the S2 Appendix).

66 The numbers of these arrangements in *E. coli* are shown in Table S8 in the S3 Appendix. From the  
 67 measurements of these genes' protein levels, we then establish a model that we use to explore the state  
 68 space of potential dynamics under the control of tandem promoters (Fig 2 illustrates our workflow).

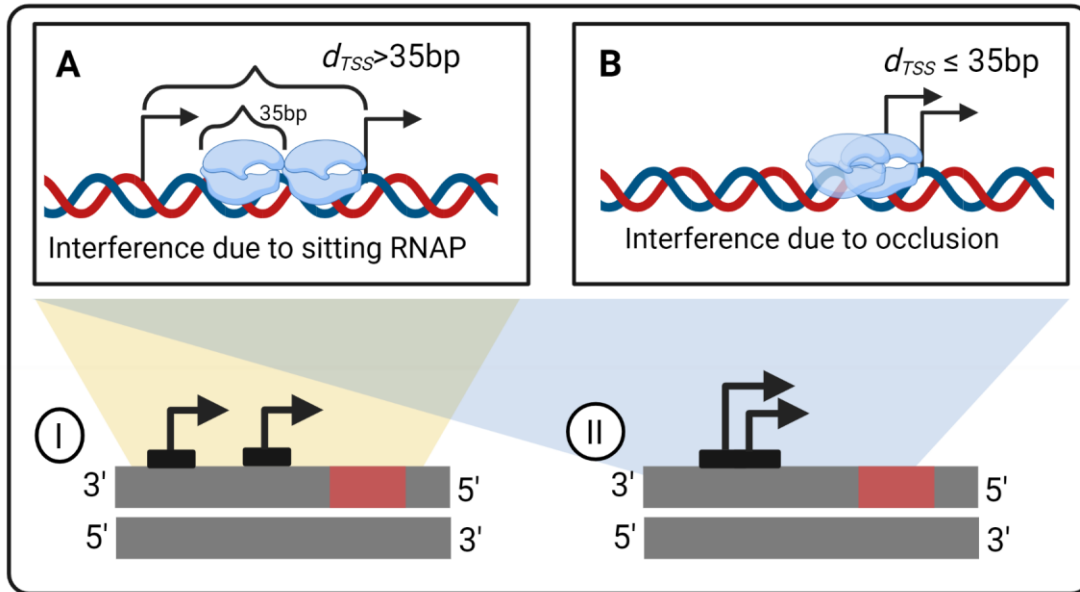

69 **Fig 1. Interference between tandem promoters with different arrangements relative to each other**  
 70 **and to neighbour genes. (A)** Interference by an RNAP occupying the downstream promoter on the activity  
 71 of the elongating RNAP from upstream promoter. The TSSs need to be at least 36 bp apart (the length  
 72 occupied by an RNAP when in OC, [23, 25]) **(B)** Interference by occlusion of one of the promoter's TSS by  
 73 an RNAP on the TSS of the other promoter. The distance between the TSSs need to be  $\leq 35$  bp apart. Blue  
 74 clouds are RNAPs. Black arrows sit on TSSs and point towards the direction of transcription elongation.  
 75 Arrangements **(I-II)** of two promoters studied in the manuscript in tandem formation are represented. The  
 76 red rectangles are the protein coding regions. We studied only the natural tandem promoters that neither  
 77 overlap with nor have in between another gene (arrangements I and II, which differ based on whether the  
 78 promoter regions overlap or not). Other arrangements (not considered in this study) are shown in Fig. S1  
 79 in the S2 Appendix. Figure created with BioRender.com.

81

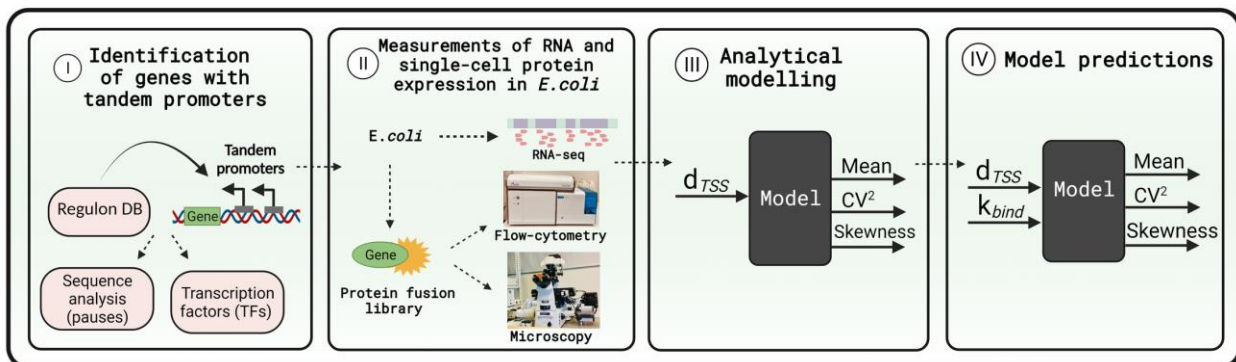

82

83 **Fig 2. Workflow.** (I) We identified genes controlled by tandem promoters in Regulon DB. (II) Next, we  
84 measured the single-cell protein levels of those genes with arrangements I and II that are tagged in the  
85 YFP strain library [28]. We also measured the mean RNA fold changes of these genes over time (S1  
86 Appendix, section ‘RNA-seq measurements and data analysis’). (III) We used the single-cell data to tune  
87 the model. (IV) Finally, we used the model to explore the state space of protein expression. Figure created  
88 with BioRender.com.

## 89 Results

90 *E. coli* has 831 genes controlled by two or more promoters in tandem formation (RegulonDB and section  
91 ‘Selection of natural genes controlled by tandem promoters for flow-cytometry’ in the S1 Appendix).  
92 However, to study the dynamics of genes controlled by tandem promoters, we focused on only 102 of them,  
93 because their activity is expected to be undisturbed by neighboring genes in the DNA (arrangements I and  
94 II in Fig 1), for reasons described in section ‘Selection of natural genes controlled by tandem promoters for  
95 flow-cytometry’ in the S1 Appendix.

96 Further, these promoters do not have specific short nucleotide sequences capable of affecting RNAP  
97 elongation (section ‘Pause sequences’ in the S4 Appendix). Also, the 102 genes expressed by these  
98 promoters are not overrepresented in a particular biological process (section ‘Over-representation test’ in  
99 the S4 Appendix). From time-lapse RNA-seq data (S1 Appendix, section ‘RNA-seq measurements and  
100 data analysis’), we also did not find evidence that their dynamics are affected by their input transcription  
101 factors (TFs) in our measurement conditions (section ‘Input-output transcription factor relationships’ in the  
102 S4 Appendix) nor by H-NS in a consistent manner (section ‘Regulation by H-NS’ in the S4 Appendix).  
103 Finally, they do not exhibit any particular TF network features (Table S3 in the S3 Appendix). As such,  
104 neither input TFs nor specific nucleotide sequences are considered in the model below. In addition to all of  
105 the above, we found no correlations between the shortest distance from the TSS of upstream promoters  
106 from the *oriC* region in the DNA and expression levels (section ‘Relationship with the *oriC* region’ in the  
107 S4 Appendix).

## 108 Model of gene expression controlled by tandem promoters

109 RNAPs bind, slide along, and unbind from a promoter several times until, eventually, one of them finds the  
110 TSS [29-30], commits to OC at the TSS, and initiates transcription elongation.

111 Reactions (1a1) are a 4-step (I-IV) model of transcription [20, 31]. The forward reaction in step I in (1a1)  
112 models RNAP binding to a free promoter ( $P_{free}$ ), which becomes no longer free albeit the RNAP might not  
113 yet have reached the TSS. This state, pre-finding of the TSS, is here named  $P_{bound}$  and its occurrence  
114 increases with RNAP concentration,  $[R]$ . Next, as it percolates the DNA, the RNAP should find and stop at

115 the nearest TSS and form a closed complex (CC) with the DNA (step II, Reaction 1a1). CCs are unstable,  
 116 i.e. reversible [22] (reaction 1a2) but, eventually, one of them will commit to OC irreversibly [32], via step  
 117 III, Reaction 1a1 [21-22]. It follows RNAP escape from the TSS, freeing the promoter (step IV, Reaction  
 118 1a1) [33-37]. Then, the RNAP elongates ( $R_{elong}$ ) until producing a complete RNA (reaction 1a3) and freeing  
 119 itself.

120 These set of reactions usually model well stochastic transcription dynamics [20]. However, if two promoters  
 121 are closely spaced in tandem formation, they can interfere [38]. Figure 3 shows sequences of events that  
 122 can lead to interference between tandem promoters, not accounted for by the model above.

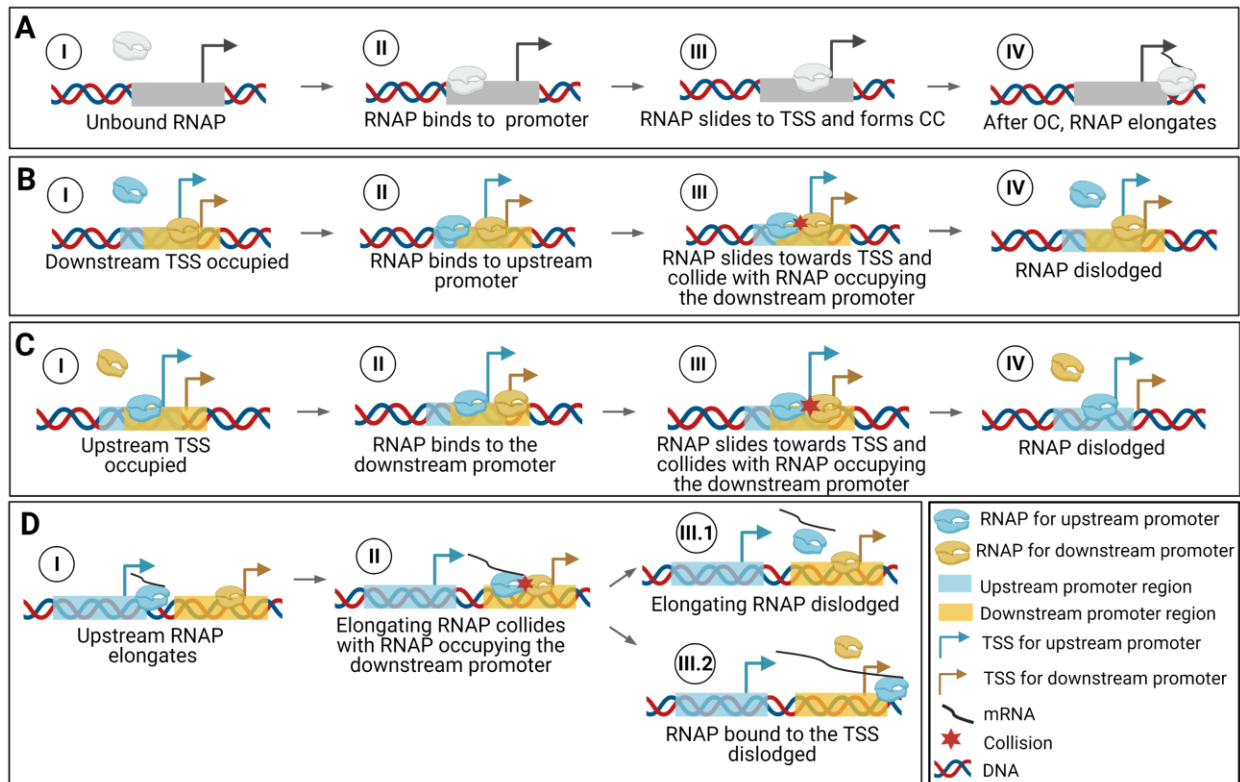

123  
 124 **Fig 3. Events leading to transcriptional interference between tandem promoters.** (A) Sequence of  
 125 events in transcription in isolated promoters. A similar set of events occurs in tandem promoters, if only one  
 126 RNAP interacts with them at any given time. (B / C) Interference due to the occlusion of the *downstream* /  
 127 *upstream* promoter by a bound RNAP, which will impede the incoming RNAP from binding to the TSS. (D)  
 128 Interference of the activity of the RNAP incoming from the upstream promoter by the RNAP occupying the  
 129 downstream promoter. One of these RNAPs will be dislodged by the collision. Created with BioRender.com.

130 From Figure 3, if the TSSs are sufficiently close, the occupancy of one TSS by an RNAP will occlude the  
 131 other TSS, blocking its kinetics [18]. This is accounted for by reaction 1a5, which competes with CC  
 132 formation in reaction 1a1. Its rate constant,  $k_{occlusion}$ , is defined in the next section. In (1a5), 'u/d' stands for  
 133 occlusion of the upstream promoter by an RNAP on the TSS of the downstream promoter.

134 Instead, if the TSSs are not sufficiently close, they will still interfere since the elongating RNAP ( $R_{elong}$ )  
 135 starting from the upstream promoter can collide with RNAPs on the TSS of the downstream promoter. This  
 136 can dislodge either RNAP via (reaction 1a4) or (reaction 2a3), depending on the sequence-dependent  
 137 binding strength of the RNAP to the TSS [9].

138 Finally, once reaction 1a1 occurs, either reaction 1a3 or 1a4 occur. To tune their competition, we introduced  
 139 the terms  $\omega_d$  and  $(1-\omega_d)$  in their rate constants, with  $\omega_d$  being the fraction of times that an elongating RNAP  
 140 from an upstream promoter finds an RNAP occupying the downstream promoter. Meanwhile, ' $f$ ' is the  
 141 fraction of times that the RNAP occupying the downstream promoter falls-off due to the collision with an  
 142 elongating RNAP, whereas ' $1-f$ ' is the fraction of times that it is the elongating RNAP that falls-off.

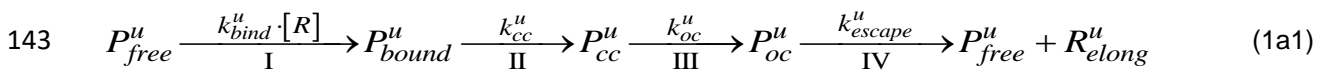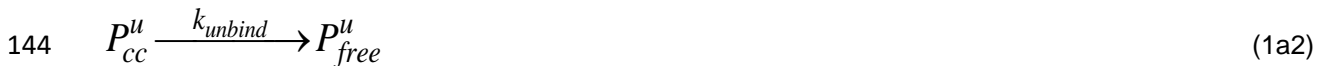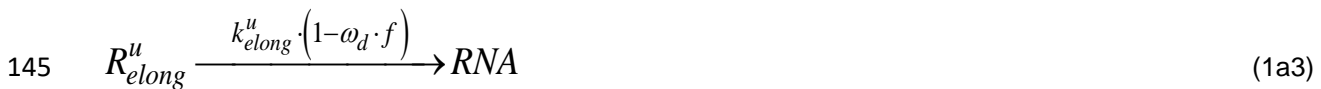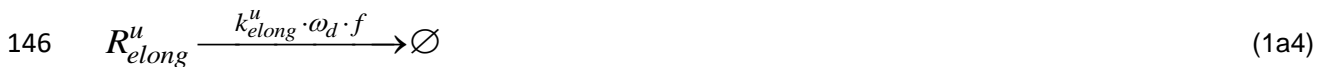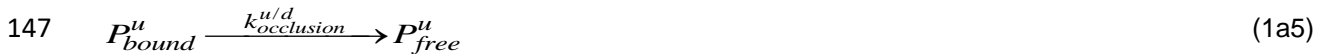

148 Next, we reduced the model and derived its analytical solution. First, since  $P_{cc}$  completion is expected to  
 149 be faster than  $P_{bound}$  completion ([10] and references within) we merged them into a single state,  $P_{occupied}$ ,  
 150 which represents a promoter occupied by an RNAP prior to commitment to OC, whose time length is similar  
 151 to  $P_{bound}$ .

152 Similarly, in standard growth conditions, the occurrence of multiple failures in escaping the promoter [46]  
 153 per OC completion should only occur in promoters with the highest binding affinity to RNAP. Thus, in  
 154 general promoter escape should be faster than OC [20, 32]. We thus merged OC and promoter escape into  
 155 one step named 'events after commitment to OC', with a rate constant  $k_{after}$ . The simplified model is thus:

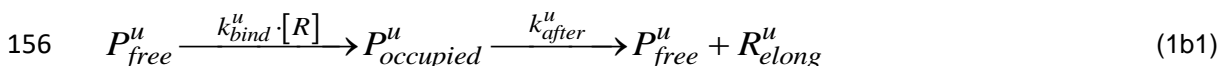

157 These two steps are not merged since only the first differs with RNAP concentration [20, 26,39]. Further,  
 158 reports [40-41] indicate that *E. coli* has ~100-1000 RNAPs free for binding at any moment but ~4000 genes,  
 159 suggesting that the number of free RNAPs is a limiting factor.

160 Finally, we merge (1a2), (1a5) and (1b1) in one multistep without affecting the model kinetics:

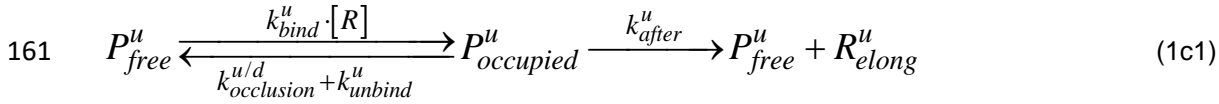

162 Overall, this reduced model of transcription of upstream promoters has a multistep reaction of transcription  
 163 initiation (1c1), a reaction of transcription elongation (1a3) and a reaction for failed elongation due to RNAPs  
 164 occupying the downstream promoter (1a4).

165 Regarding RNA production from the downstream promoter, it should either be affected by occlusion if  $d_{TSS} \leq 35$ ,  
 166 or by RNAPs elongating from the upstream promoter if  $d_{TSS} > 35$  (Fig 3). We thus use reactions (2a1),  
 167 (2a2), and (2a3) to model these promoters' kinetics:

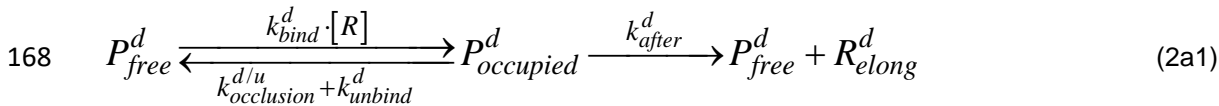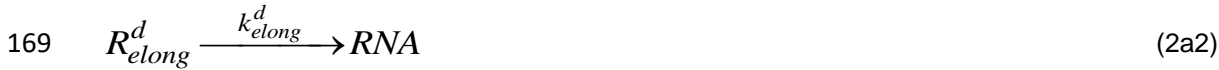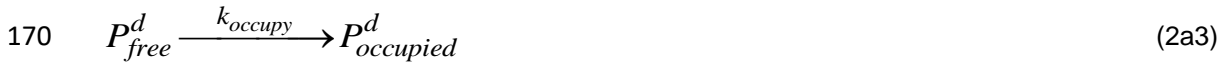

171 Finally, one needs to include a reaction for translation (reaction 3), as a first order process since protein  
 172 numbers follow RNA numbers linearly (Fig S6 in the S2 Appendix), and reactions for RNA and protein  
 173 decay accounting for degradation and for dilution due to cell division (reactions 4a and 4b, respectively).  
 174 TF regulation is not included as noted above (Figs S3 and S4A in the S2 Appendix).

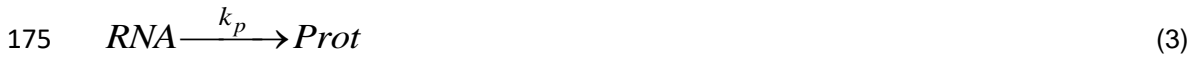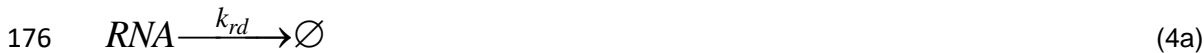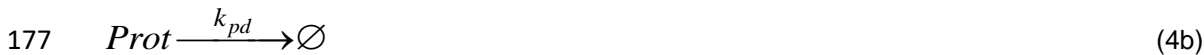

## 178 Transcription interference by occlusion

179 In a pair of tandem promoters, the  $k_{occlusion}$  of one of them should increase with the fraction of time that  
 180 the other one is occupied. Further, it should decrease with increasing  $d_{TSS}$  between the two promoters'

181 TSS. We thus define  $k_{occlusion}$  for the upstream (Eq. 5a) and downstream (Eq. 5b) promoters, respectively  
 182 as:

$$183 \quad k_{occlusion}^{u/d} = k_{ocl}^{\max} \cdot I(d_{TSS}) \cdot \omega_d \quad (5a)$$

$$184 \quad k_{occlusion}^{d/u} = k_{ocl}^{\max} \cdot I(d_{TSS}) \cdot \omega_u \quad (5b)$$

185 Here,  $k_{ocl}^{\max}$  is the maximum occlusion possible. It occurs when the two TSSs completely overlap each other  
 186 ( $d_{TSS} = 0$ ) and the TSS of the ‘other’ promoter is always occupied. Meanwhile,  $I(d_{TSS})$  models distance-  
 187 dependent interference.

188 We tested four models of interference: ‘exponential 1’, ‘exponential 2’, ‘step’, and ‘zero order’ (Table 1).  
 189 The first two assume that the effects of occlusion decrease exponentially with  $d_{TSS}$  (first and second order  
 190 dependency, respectively).

191 Meanwhile, the ‘Step’ model assumes that interference only occurs precisely in the region in the DNA  
 192 occupied by the RNAP when in OC formation. For this, it uses a logistic equation to build a continuous step  
 193 function, where  $L$  is the length of DNA (in bp) occupied by the RNAP in OC. As such,  $L$  tunes at what  $d_{TSS}$   
 194 the step occurs, while  $m$  is the steepness of that step (set to  $1 \text{ bp}^{-1}$ ).

195 Finally, the ‘Zero order’ model assumes (unrealistically) that interference by occlusion, is independent of  
 196  $d_{TSS}$ . Fig S7 in the S2 Appendix shows how  $k_{occlusion}$  differs with  $d_{TSS}$  in each model, for various  
 197 parameter values.

198 **Table 1. Potential models of transcriptional interference due to promoter occlusion considered.**

| Interference by occlusion | $I(d_{TSS})$                                     | $k_{occlusion}$                                                                                                       |
|---------------------------|--------------------------------------------------|-----------------------------------------------------------------------------------------------------------------------|
| Exponential 1 (“Exp1”)    | $e^{-(b_1 \cdot d_{TSS})}$                       | $k_{ocl}^{\max} \cdot e^{-(b_1 \cdot d_{TSS})} \cdot \omega$                                                          |
| Exponential 2 (“Exp2”)    | $e^{-(b_1 \cdot d_{TSS} + b_2 \cdot d_{TSS}^2)}$ | $k_{ocl}^{\max} \cdot e^{-(b_1 \cdot d_{TSS} + b_2 \cdot d_{TSS}^2)} \cdot \omega$                                    |
| Step (“Step”)             | $1 - \frac{1}{1 + e^{-m \cdot (d_{TSS} - L)}}$   | $k_{ocl}^{\max} \cdot \left( 1 - \frac{1}{1 + e^{-(d_{TSS} - L)}} \right) \cdot \omega$ , for $m = 1 \text{ bp}^{-1}$ |



|                      |     |                               |
|----------------------|-----|-------------------------------|
| Zero order ("ZeroO") | $k$ | $k_{ocl}^{\max} \cdot \omega$ |
|----------------------|-----|-------------------------------|

199

200 Finally,  $\omega$  is the fraction of time that the 'other' promoter is occupied. It ranges from 0 (no occupancy) to 1  
 201 (always occupied). It is estimated for upstream and downstream promoters as:

$$202 \quad \omega_u = \frac{k_{bind}^u \cdot [R]}{k_{unbind}^u + k_{bind}^u \cdot [R] + k_{after}^u} \quad (6a)$$

$$203 \quad \omega_d = \frac{k_{bind}^d \cdot [R]}{k_{unbind}^d + k_{bind}^d \cdot [R] + k_{after}^d} \quad (6b)$$

204 Similarly, if  $k_{occupy}^{\max}$  is the maximum possible interference due to RNAPs occupying the downstream  
 205 promoter,  $k_{occupy}$  is defined as:

$$206 \quad k_{occupy} = \omega_u \cdot k_{after}^u \cdot k_{occupy}^{\max} \cdot (1-f) \quad (7)$$

## 207 Analytical solution of the moments of the single-cell protein 208 numbers

209 Next, we derived an analytical solution of the expected mean single-cell protein numbers at steady state,  
 210  $M_P$ , which is later tuned to fit the empirical data. For any gene, regardless of the underlying kinetics of  
 211 transcription,  $k_r$  is the *effective* rate of RNA production. Based on the reactions above, the mean protein  
 212 numbers in steady state will be (see sections "Analytical model of mean RNA levels controlled by a single  
 213 promoter in the absence of a closely spaced promoter" and "Derivation of mean protein numbers at steady  
 214 state produced by a pair of tandem promoters" in the S1 Appendix):

$$215 \quad M_P = \frac{k_r \cdot k_p}{k_{rd} \cdot k_{pd}} \quad (8)$$

216 This equation applies to a pair of tandem promoters as well. In that case, assuming that  $k_{bind}$  of the two  
 217 tandem promoters is similar, we have:

$$k_r = \left( \frac{k_{bind} \cdot [R] \times k_{after} \cdot (1 - \omega_d \cdot f)}{k_{occlusion} + k_{bind} \cdot [R] + k_{unbind} + k_{after}} + \frac{k_{bind} \cdot [R] \times k_{after}}{k_{occlusion} + k_{occupy} + k_{bind} \cdot [R] + k_{unbind} + k_{after}} \right) \quad (9)$$

219 To derive the other moments, we considered that empirical single-cell protein numbers in *E. coli* are well fit  
 220 by negative binomials [28]. Consequently,  $M_p$  and the squared coefficient of variation  $CV_p^2$ , should be  
 221 related as (Equations S28 to S38 in the S1 Appendix):

$$\log_{10}(CV_p^2) = \log_{10}(C_1) - \log_{10}(M_p), \quad \text{with} \quad C_1 = \frac{k_p}{k_{pd} + k_{rd}} \quad (10)$$

223 This relationship matches empirical data at the genome wide level, except for genes with high transcription  
 224 rates [54]. Additionally, we further derived a relationship (Section ‘CV<sup>2</sup> and Skewness of single-cell protein  
 225 expression of a tandem promoter’s model’ in the S1 Appendix) between  $M_p$  and the skewness,  $S_p$ , of the  
 226 single-cell distribution of protein numbers:

$$\log_{10}(S_p) = \log_{10}(C_2) - \frac{1}{2} \cdot \log_{10}(M_p), \quad \text{with} \quad C_2 = 2\sqrt{C_1} - \frac{1}{\sqrt{C_1}} \quad (11)$$

## 228 Single-cell distributions of protein numbers

229 To validate the model, we measured by flow-cytometry the single-cell distributions of protein fluorescence  
 230 of 30 out of the 102 genes known to be controlled by tandem promoters (with arrangements I and II).  
 231 Measurements were made in 1X and 0.5X media (3 replicates per condition) using cells from the YFP strain  
 232 library (section ‘Strains and Growth Conditions’ in the S1 Appendix). Data from past studies show that, in  
 233 these 30 genes, RNA and protein numbers are well correlated (Fig S6 in the S2 Appendix) in standard  
 234 growth conditions. Past studies also suggest that most of these genes are active during exponential growth  
 235 (~95% of our 30 genes selected should be active, according to data in [42] using SEnd-seq technology).

236 Single-cell distributions of protein expression levels are shown in Fig 4A for one of these genes as an  
 237 example. The raw data from all 30 genes (only one replicate) are shown in Fig S8 in the S2 Appendix.  
 238 Finally, the mean, CV<sup>2</sup> and skewness for each gene, obtained from the triplicates, are shown in Excel  
 239 sheets 1 and 2 in the S6 Table. In addition, we also show this mean, CV<sup>2</sup> and skewness after subtracting  
 240 the first, second, and third moments of the single-cell distribution of the fluorescence of control cells, which

241 do not express YFP (Sheets 3, 4 in the S6 Table) (Section 'Subtraction of background fluorescence from  
242 the total protein fluorescence' in the S1 Appendix).

243 Based on the analysis of the data of these 30 genes, we removed from subsequent analysis those genes  
244 (5 in 1X and 14 in 0.5X) whose mean, variance, or third moment of their protein fluorescence distributions  
245 are lower than in control cells (not expressing YFP), i.e., than cellular autofluorescence (Sheets 3, 4 in S6  
246 Table). As such, only one gene studied here (in condition 1X alone) codes for a protein that is associated  
247 to membrane-related processes, which might affect its quantification (section 'Proteins with membrane-  
248 related positionings' in S4 Appendix). As such, we do not expect this phenomenon to influence our results  
249 significantly. The data from these genes removed from further analysis is shown in Fig S6 in S2 Appendix  
250 alone, for illustrative purposes.

251 We started by testing the accuracy of the background-subtracted flow-cytometry data by confronting it with  
252 microscopy data (also after background subtraction, see section 'Microscopy and Image Analysis' in the S1  
253 Appendix). We collected microscopy data on 10 out of the 30 genes (Table S7 in the S3 Appendix). The  
254 microscopy measurements of the mean single-cell fluorescence expressed by these genes (example image  
255 in Fig. 4B), were consistent, statistically, with the corresponding data obtained by flow-cytometry (Fig 4C).

256 Next, we converted the fluorescence distributions from flow-cytometry (25 genes in 1X and 16 genes in  
257 0.5X) into protein number distributions. In Fig 4D we plotted our measurements of mean protein  
258 fluorescence in 1X against the protein numbers reported in [28] for the same genes, in order to obtain a  
259 scaling factor ( $sf = 0.09$ ). Using  $sf$ , we estimated  $M_P$ ,  $CV_P^2$ , and  $S_P$  of the distribution of protein numbers  
260 expressed by the tandem promoters in (Sheets 5, 6 in S6 Table) (Section 'Conversion of protein  
261 fluorescence to protein numbers' in S1 Appendix).

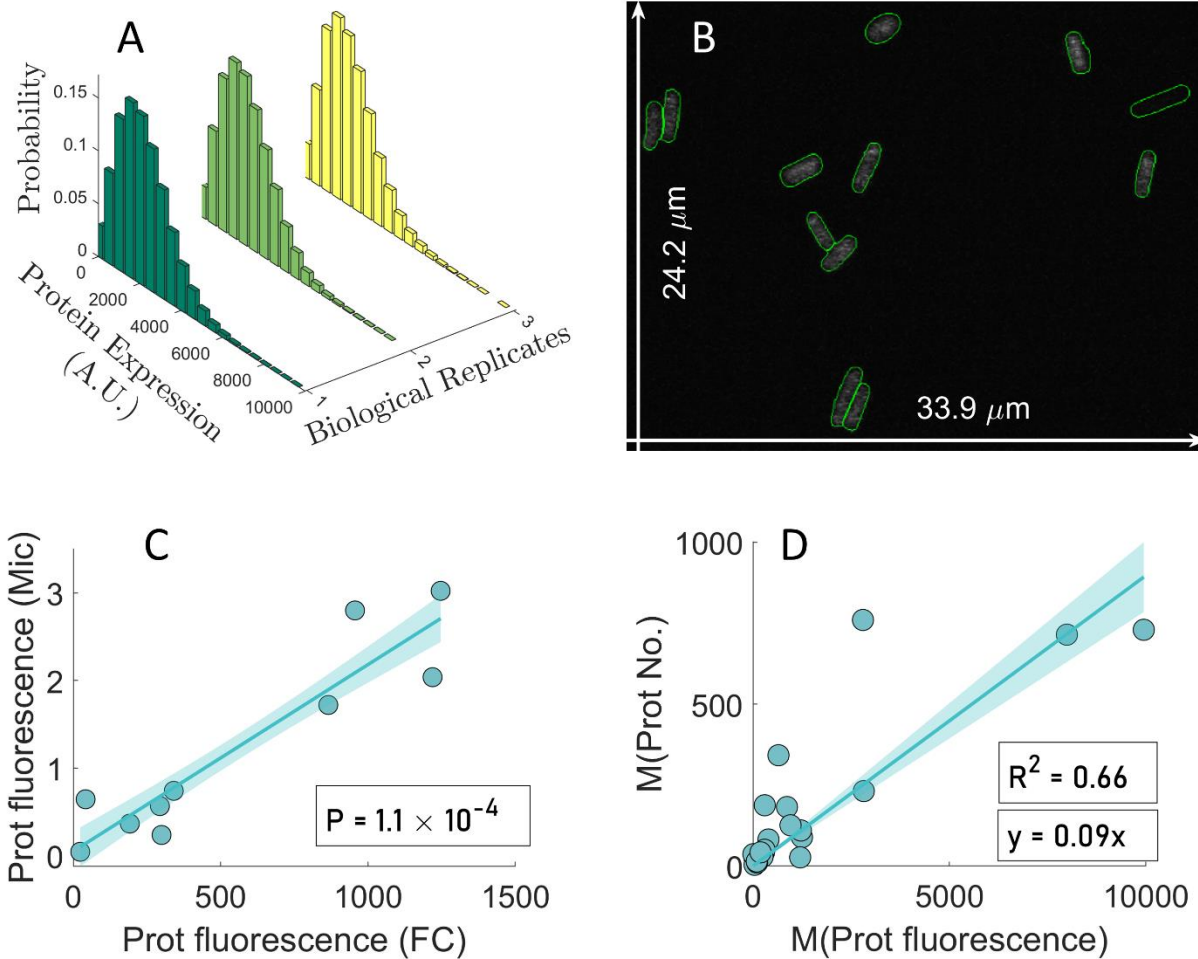

262

263 **Fig 4. Single cell protein numbers by microscopy and flow-cytometry.** (A) Example single-cell  
 264 distributions (3 biological replicates) of fluorescence (in arbitrary units) of cells with a YFP tagged gene  
 265 controlled by a pair of tandem promoters obtained by flow-cytometry, 'FC'. (B) Example confocal  
 266 microscopy image of cells overlapped by the results of cell segmentation from the corresponding phase  
 267 contrast image. The two white arrows show the dimensions of the image, for scaling purposes. (C) Mean  
 268 single-cell protein fluorescence of 10 genes (Table S7 in the S3 Appendix) when obtained by FC plotted  
 269 against when obtained by microscopy, 'Mic'. (D) Mean single-cell protein fluorescence (own measurements)  
 270 plotted against the corresponding mean single-cell protein numbers reported in [28]. From the equation of  
 271 the best fitting line without y-intercept (y-intercept = 0), we obtained a scaling factor, *sf*, equal to 0.09.

272 To test the robustness of the estimation of the scaling factor, we also estimated a scaling factor from 10  
 273 other genes present in the YFP strain library [28] (listed in Table S2 in S3 Appendix). These genes were  
 274 selected as described in the section 'Selection of natural genes controlled by single promoters' in S1  
 275 Appendix. Using the data from this new gene cohort (Supplementary Figure S9A in S2 Appendix) reported  
 276 in S7 Table, we estimated a scaling factor of 0.08, supporting the previous result. Meanwhile, since when

277 merging the data from tandem and single promoters, the resulting scaling factor equals 0.09  
278 (Supplementary Figure S9B in S2 Appendix), we opted for using 0.09 from here onwards.

279 We also tested how sensitive the estimated scaling factor is to the removal of data points. Specifically, for  
280 1000 times, we discarded  $N$  randomly selected data points, and estimated the resulting scaling factor. We  
281 then compared, for each  $N$ , the mean and the median of the distribution of 1000 scaling factors  
282 (Supplementary Figure S10 in S2 Appendix). Since the median is not sensitive to outliers, if mean and  
283 median are similar, one can conclude that the scaling factor is not biased by a few data points. Visibly, the  
284 mean and the median only start differing for  $N$  larger than 6, which corresponds to nearly 30% of the data.

## 285 **Log-log relationship between the mean single-cell protein** 286 **numbers of tandem promoters and the other moments**

287 We plotted  $M_P$  against  $CV_P^2$  and  $S_P$  in log-log plots, in search for the fitting parameters, ' $C_1$ ' and ' $C_2$ ', to  
288 estimate the rate of protein production per RNA (equation 10). To increase the state space covered by our  
289 measurements, in addition to M9 media (named '1X'), we also used diluted M9 media (named '0.5X'),  
290 known to cause cells to have lower RNAP concentrations (Fig. 5A) (Section 'Strains and growth conditions'  
291 in the S1 Appendix), without altering the division rate (Figs. S11A and S11B in the S2 Appendix). We note  
292 that 1X and 0.5X only refer to the degree of dilution of the original media and not to how much RNAP  
293 concentration and consequently, protein concentrations, were reduced by media dilution. From the same  
294 figures, we attempted stronger dilutions, but no further decreases in RNAP concentration were observed  
295 and the growth rate decreased.

296 Next, from Fig 5B, most genes (of those expressing tangibly in both media) suffered similar reductions (well  
297 fit by a line) in protein numbers with the media dilution, as expected by the model of gene expression  
298 (Equations 8 and 9). This linear relationship could also be interpreted as evidence that the difference in  
299 expression of these genes between the two conditions is not affected by TFs in our measurement  
300 conditions. Namely, if TF influences existed, and TF numbers changed, they would likely be diversely  
301 affected by their output genes (weakly and strongly activated, repressed, etc.) and, thus, our proteins of  
302 interest would not have changed in such similar manners (linearly).

303 Meanwhile, as in [44-45],  $CV_P^2$  decreases linearly with  $M_P$  (log-log scale), irrespective of media ( $R^2 > 0.8$   
304 in all fitted lines), in agreement with the model (Fig 5C). Fitting Equation 10 to the data, we extracted  $C_1$  in  
305 each condition.  $S_P$  also decreases linearly with  $M_P$ , irrespective of the media (Fig 5D). Similar to above,  
306 Equation 11 was fitted to each data set and  $C_1$  and  $C_2$  were obtained ( $R^2 > 0.6$  for all lines).

307 Since  $C_1$  from Fig 5C and 5D differed slightly (likely due to noise), we instead obtained  $C_1$  and  $C_2$  values  
 308 that maximized the mean  $R^2$  of both plots. Using 'fminsearch' function in MATLAB [46], we obtained  $C_1 =$   
 309 72.71 and  $C_2 = 16.94$  ( $R^2$  of 0.80 and 0.61, respectively) for Fig 5C and Fig 5D, respectively.

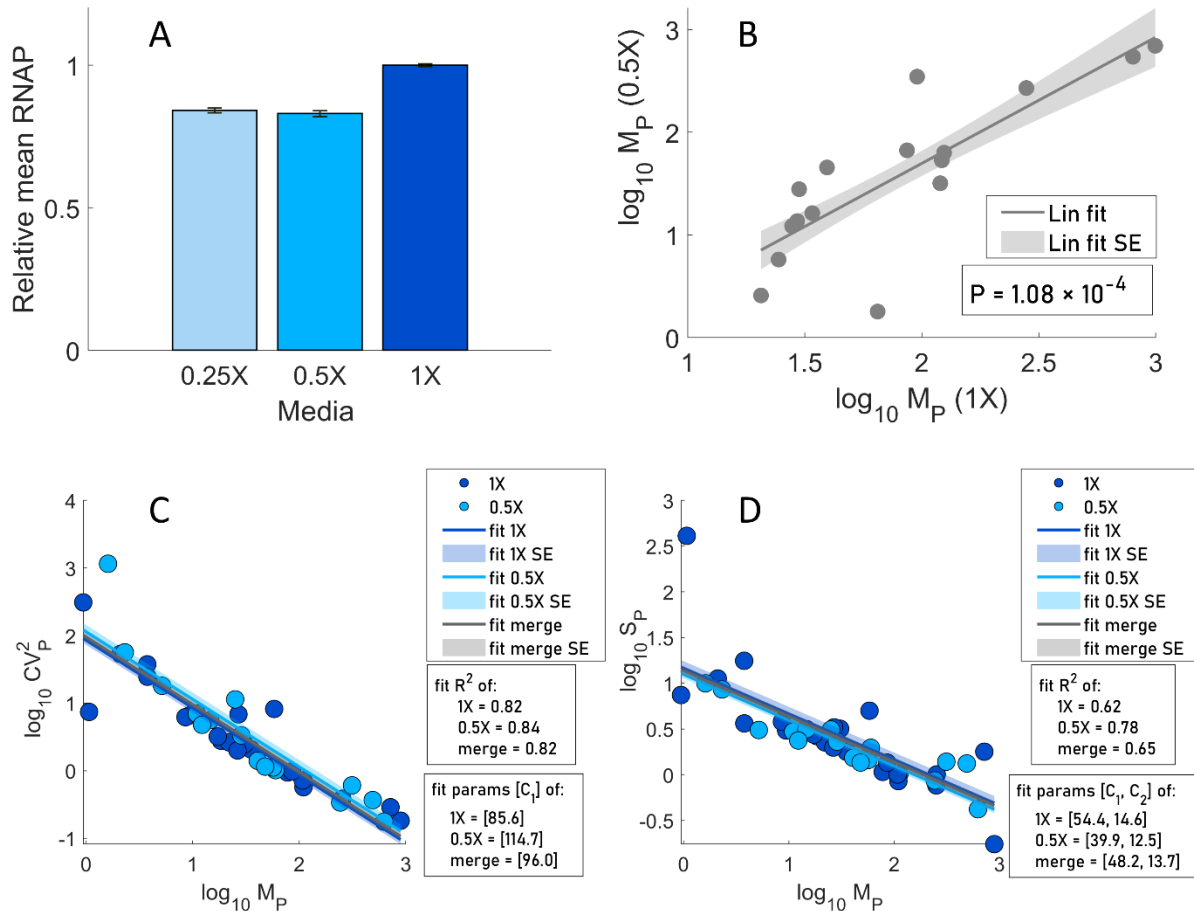

310

311 **Fig 5. Relative RNAP concentrations along with the relationships between the moments of the single**  
 312 **cell distributions of protein numbers.** (A) Relative RNAP levels measured by flow-cytometry (Section  
 313 'flow-cytometry' in the S1 Appendix) in three media. (B) Scatter plot between  $M_P$  in M9 (1X) and diluted M9  
 314 (0.5X) media. Also shown are the best fitting line and standard error and p-value for the null hypothesis that  
 315 the slope is zero. (C)  $M_P$  vs  $CV_P^2$  and (D)  $M_P$  vs  $S_P$  of single-cell protein numbers of genes with tandem  
 316 promoters in M9 (1X) and M9 diluted (0.5X) media. The lines and their shades are the best fitting lines and  
 317 standard errors, respectively. 'Merge' stands for data from both 0.5X and 1X conditions.

318 **Inference of parameter values and model predictions as a**  
 319 **function of  $d_{TSS}$**

320 We next used the model, after fitting, to predict how  $d_{TSS}$  and the promoters' occupancy regulate the  
321 moments of the single-cell distribution of protein numbers ( $M_P$ ,  $CV_P^2$ , and  $S_P$ ) under the control of tandem  
322 promoters. We started by assuming the parameter values from the literature listed in Table 2 and tuned the  
323 remaining parameters.

324 To set the RNAP numbers in Table 2, we considered that the RNAPs affecting transcription rates are the  
325 free RNAPs in the cell, and that, for doubling times of 30 min in rich medium, there are ~1000 free RNAPs  
326 per cell [41]. Meanwhile, for doubling times of 60 min in minimal medium, there are ~144 [40]. In both our  
327 media, we observed a doubling time of ~115 mins (Fig. 5B). Thus, we expect the free RNAP in 1X to also  
328 be ~144/cell or lower. Meanwhile, in 0.5X, we measured the RNAP concentration to be 17% lower than in  
329 1X (Fig. 5A) and no morphological changes. Thus, we assume the free RNAP in 0.5X to equal ~120/cell.

330 Next, we fitted the equations (8) and (9) relating  $d_{TSS}$  with  $\log_{10}(M_P)$  in all interference models (Table 1),  
331 using the data on  $M_P$  in 1X medium (Fig 6A) and the 'fit' function of MATLAB. For this, we set  $k^{\max} = k_{occupy}^{\max}$   
332  $= k_{ocl}^{\max}$ , for simplicity, as well as realistic bounds for each parameter to infer. To avoid local minima, we  
333 performed 200 searches, each starting from a random initial point, and selected the one that maximized  
334  $R^2$ . Results are shown in Table 3.

335 Next, we inserted all parameter values (empirical and inferred) in Equations (10) and (11) to predict  $CV_P^2$   
336 and  $S_P$  in 1X medium (Figs 6B and 6C). Also, we inserted the same parameter values and the estimated  
337 RNAP numbers in 0.5X medium in equations (8-11) to obtain the analytical solutions for  $M_P$ ,  $CV_P^2$  and  $S_P$   
338 for 0.5X medium (Figs 6D, 6E and 6F).

339 From Fig. 6, the data is 'noisy', which suggests that it is not possible to establish if the models are  
340 significantly different. As such, here we only select the one that best explains the data, based on the  $R^2$   
341 values of the fittings. Table 3 shows the mean  $R^2$  for  $M_P$ ,  $CV_P^2$ , and  $S_P$  when confronting the model with  
342 the data. Overall, from the  $R^2$  values, the step model is the one that best fits the data. Meanwhile, the  
343 'ZeroO' model is the least accurate, which supports the existence of distinct kinetics when  $d_{TSS}$  is smaller  
344 or larger than 35 nucleotides, which is the length of the RNAP when committed to OC on the TSS [23-25].

345 In summary, the proposed model of expression of genes under the control of a pair of tandem promoters is  
346 based on a standard model of transcription of each promoter, which are subject to interference, either due  
347 to occlusion of the TSSs or by RNAP occupying the downstream promoter on the TSS of the downstream  
348 promoter. The influence of each occurrence of these events is well modeled by linear functions of TSS  
349 occupancy times, while their dependency on  $d_{TSS}$  is modeled by a continuous step function. If  $d_{TSS}$  is larger

350 than 35 bp, effects from the RNAP occupying the downstream promoter can occur, else occlusion can  
 351 occur.

352 **Table 2. Parameter values imposed identically on all models.**

| Parameter description                                               | Parameter                            | Value                                     | References                                                                                                                          |
|---------------------------------------------------------------------|--------------------------------------|-------------------------------------------|-------------------------------------------------------------------------------------------------------------------------------------|
| Inverse of the mean time to complete OC                             | $k_{after}$                          | 0.005 s <sup>-1</sup>                     | Differs between promoters. Since empirical data lacks, we used the data from <i>in vivo</i> single RNA measures for Lac-Ara-1 [20]. |
| RNA and protein dilution due to division                            | $k_{dil} = \frac{\ln(2)}{D}$         | 1.005 × 10 <sup>-4</sup> s <sup>-1</sup>  | Legend of Fig S8                                                                                                                    |
| RNA degradation                                                     | $k_{rdeg}$                           | 2.3 × 10 <sup>-3</sup> s <sup>-1</sup>    | [28]                                                                                                                                |
| RNA decay due to dilution from cell division and due to degradation | $k_{rd} = k_{rdeg} + k_{dil}$        | 2.4 × 10 <sup>-3</sup> s <sup>-1</sup>    | From row 2.                                                                                                                         |
| Protein degradation                                                 | $k_{pdeg}$                           | 2.93 × 10 <sup>-5</sup> s <sup>-1</sup>   | [47], estimates it to be from ~6×10 <sup>-5</sup> to ~2×10 <sup>-5</sup> . We used the value in [48], in that interval.             |
| Protein decay due to dilution by cell division and degradation      | $k_{pd} = k_{pdeg} + k_{dil}$        | 1.3 × 10 <sup>-4</sup> s <sup>-1</sup>    | From rows 2 and 5.                                                                                                                  |
| Fall-off probability of the RNAP occupying the downstream promoter  | $f$                                  | 50% (0.5)                                 | Set here (likely sequence-dependent)                                                                                                |
| Protein production rate constant                                    | $k_p = C_1 \times (k_{pd} + k_{rd})$ | 0.18 s <sup>-1</sup>                      | $C_1$ is estimated here.                                                                                                            |
| Free RNAP per cell                                                  | $[R]$                                | 144/cell in 1X and 120/cell in 0.5X media | See main text.                                                                                                                      |

353

354 **Table 3. Parameter values inferred for each model.**

| Interference model | Inferred parameter values                                                                                                                  | Average R <sup>2</sup> (M, CV <sup>2</sup> , S) 1X medium | Average R <sup>2</sup> (M, CV <sup>2</sup> , S) 0.5X medium |
|--------------------|--------------------------------------------------------------------------------------------------------------------------------------------|-----------------------------------------------------------|-------------------------------------------------------------|
| Exponential 1      | $k_{bind} \cdot [R] = 1.09 \times 10^{-2} \text{ s}^{-1} \times (\text{cell vol})^{-1}$<br>$k_{bind} = 7.53 \times 10^{-5} \text{ s}^{-1}$ | 0.21 (Figs. 6A, 6B, and 6C)                               | 0.09 (Figs. 6D, 6E, and 6F)                                 |



|               |                                                                                                                                                                                                                                                                                                                     |                               |                              |
|---------------|---------------------------------------------------------------------------------------------------------------------------------------------------------------------------------------------------------------------------------------------------------------------------------------------------------------------|-------------------------------|------------------------------|
|               | $k_{unbind} = 0.84 \text{ s}^{-1}$<br>$k^{\max} = 677.7 \text{ s}^{-1}$<br>$b_1 = 5.08 \times 10^{-2} \text{ bp}^{-1}$                                                                                                                                                                                              |                               |                              |
| Exponential 2 | $k_{bind} \cdot [R] = 9.71 \times 10^{-3} \text{ s}^{-1} \times (\text{cell vol})^{-1}$<br>$k_{bind} = 6.74 \times 10^{-5} \text{ s}^{-1}$<br>$k_{unbind} = 0.80 \text{ s}^{-1}$<br>$k^{\max} = 554.8 \text{ s}^{-1}$<br>$b_1 = 7.92 \times 10^{-8} \text{ bp}^{-1}$<br>$b_2 = 1.47 \times 10^{-3} \text{ bp}^{-2}$ | 0.25 (Figs. 6A, 6B, and 6C)   | 0.12 (Figs. 6D, 6E, and 6F)  |
| Step          | $k_{bind} \cdot [R] = 6.62 \times 10^{-3} \text{ s}^{-1} \times (\text{cell vol})^{-1}$<br>$k_{bind} = 4.60 \times 10^{-5} \text{ s}^{-1}$<br>$k_{unbind} = 0.49 \text{ s}^{-1}$<br>$k^{\max} = 313.4 \text{ s}^{-1}$<br>$L = 35.11 \text{ bp}$ (by best fitting, which corresponds to 35 bp)                       | 0.35 (Figs. 6A, 6B, and 6C)   | 0.15 (Figs. 6D, 6E, and 6F)  |
| zero order    | $k_{bind} \cdot [R] = 4.63 \times 10^{-3} \text{ s}^{-1} \times (\text{cell vol})^{-1}$<br>$k_{bind} = 3.22 \times 10^{-5} \text{ s}^{-1}$<br>$k_{unbind} = 0.57 \text{ s}^{-1}$<br>$k^{\max} = 6.48 \text{ s}^{-1}$                                                                                                | -0.007 (Figs. 6A, 6B, and 6C) | -0.12 (Figs. 6D, 6E, and 6F) |

355

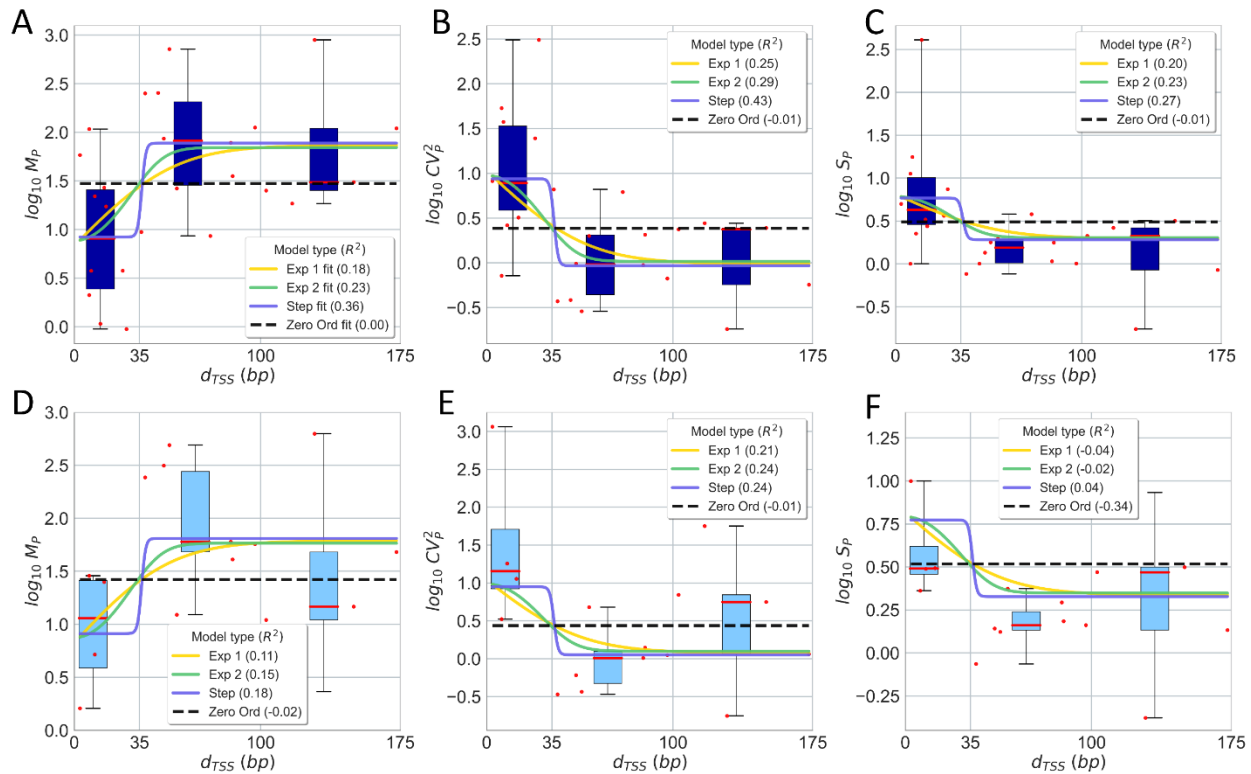

356

357 **Fig 6. Empirical data and analytical model of how  $d_{TSS}$  influences the single-cell protein numbers of**  
 358 **genes controlled by tandem promoters. (A) Mean, (B)  $CV^2$ , and (C)  $S$  of single protein numbers in the**  
 359 **1X media as a function of  $d_{TSS}$ . (D), (E), and (F) show the same for the 0.5X media, respectively. Each red**  
 360 **dot is the mean from 3 biological repeats for a pair of promoters (S6 Table). The dots were also grouped in**  
 361 **3 'boxes' based on their  $d_{TSS}$ . In each box, the red line is the median and the top and bottom are the 3<sup>rd</sup> and**  
 362 **1<sup>st</sup> quartiles, respectively. The vertical black bars are the range between minimum and maximum of the red**  
 363 **dots. In A, all lines are best fits. In B, C, D, E, and F, all lines are model predictions, based on the parameters**  
 364 **used to best fit A. The insets show the  $R^2$  for each model fit and prediction.**

365

366

367 We then confronted the analytical solutions of the step model with stochastic simulations (Section  
 368 'Stochastic simulations for the step inference model' in the S1 Appendix). We first assumed various  $d_{TSS}$ ,  
 369 but fixed  $k_{bind}$ , for simplicity. Visibly,  $M_P$ ,  $CV_P^2$ , and  $S_P$  of the stochastic simulations are well-fitted by the  
 370 analytical solution, supporting the initial assumption that  $CV_P^2$ , and  $S_P$  follow a negative binomial (Fig S13  
 371 in the S2 Appendix).

372 However, natural promoters are expected to differ in  $k_{bind}$  as they differ in sequence [49-50]. Thus, we  
 373 introduced this variability and studied whether the analytical model holds. To change the variability, we

374 obtained each  $k_{bind}$  from gamma distributions (means shown in Table 3 and CVs in Table S9 in the S3  
375 Appendix). We chose a gamma distribution since its values are non-negative and non-integer (such as rate  
376 constants). Meanwhile, all parameters of the step model, aside from  $k_{bind}$ , are obtained from Tables 2 and  
377 3. For  $d_{TSS} \leq 35$  and  $d_{TSS} > 35$ , and each CV considered, we sampled 10,000 pairs of values of  $k_{bind} \cdot [R]$ ,  
378 and calculated M,  $CV^2$  and S for each of them. Next, we estimated the average and standard deviation of  
379 each statistics. From Fig S14 in the S2 Appendix, if  $CV(k_{bind}) < 1$ , the analytical solution is robust. In  
380 that the standard error of the mean is smaller than  $M_P/3$ . Notably, for such CV, the strength of the two paired  
381 promoters would have to differ unrealistically by more than 2000%, on average (Table S9 in the S3  
382 Appendix). Thus, we find the analytical solution to be reliable.

383 From our estimation of  $k_p$ , we further estimated a protein-to-RNA ratio,  $\frac{M_P}{M_{RNA}} = \frac{k_p}{k_{pd}}$ . From Eq. 8 and

384 Table 2, we find that  $\frac{k_p}{k_{pd}} \sim 1418$  in both media, which agrees with previous estimations ( $\sim 1832$  in 27]).

385  
386 Next, we used the fitted model to predict (using Eqs. 8 to 11) the influence of promoter occupancy ( $\omega$ ) on  
387 the  $M_P$ ,  $CV_P^2$  and  $S_P$  of upstream and downstream promoters. We set  $d_{TSS}$  to 20 bp to represent  
388 promoters where  $\leq 35$ , and to 100 bp to represent promoters with  $d_{TSS} > 35$ . Then, for each cohort, we  
389 changed  $\omega$  from 0.01 to 0.99 (i.e., nearly all possible values). In addition, we estimated these moments  
390 when  $k_{occlusion}$ ,  $k_{occupy}$ , and  $\omega$  are all set to zero (i.e., the two promoters do not interfere), for comparison.

391 From Fig. 7, a pair of tandem promoters can produce less proteins than a single promoter with the same  
392 parameter values, if  $d_{TSS} \leq 35$ , which makes occlusion possible. Meanwhile, if  $d_{TSS} > 35$ , tandem promoters  
393 can only produce protein numbers in between the numbers produced by one isolated promoter and the  
394 numbers produced by two isolated promoters. In no case can two interfering tandem promoters produce  
395 more than two isolated promoters with equivalent parameter values. I.e., according to the model, the  
396 interference between tandem promoters cannot enhance production.

397 Meanwhile, the kinetics of the upstream (Figs. 7A and S15A in the S2 Appendix) and downstream  
398 promoters (Figs. 7B and S15B in the S2 Appendix) only differ in that the downstream promoter is more  
399 responsive to  $\omega$ .

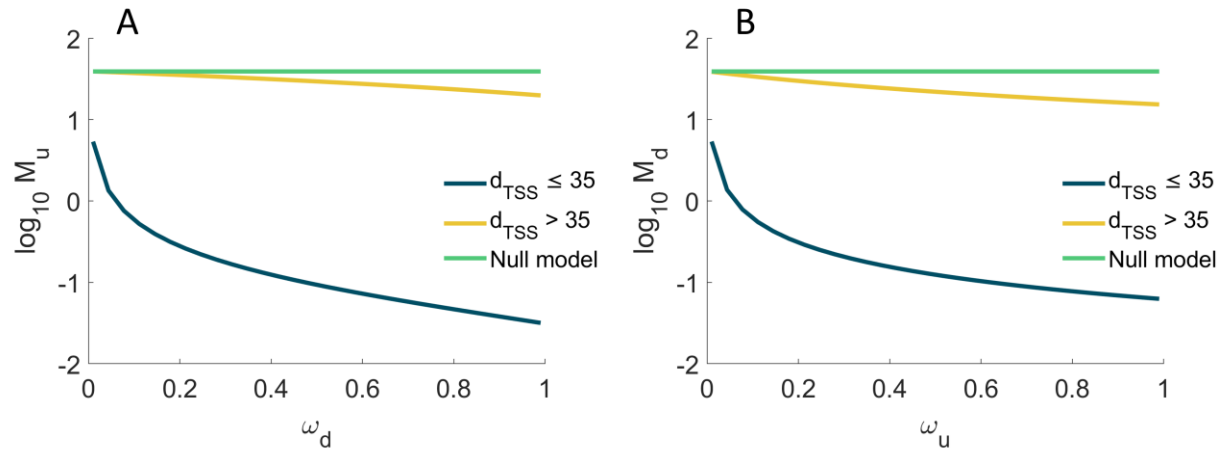

400

401 **Fig 7. Mean protein numbers produced as a function of other promoter's occupancy.**  $M_P$  of the single-  
 402 cell distribution of the number of proteins produced (A) by the upstream promoter alone, and (B) by the  
 403 downstream promoter alone. Results are shown as a function of the fraction of times that the upstream  
 404 ( $0.01 \leq \omega_u \leq 0.99$ ) and the downstream ( $0.01 \leq \omega_d \leq 0.99$ ) promoter are occupied by RNAP. The null model  
 405 is estimated by setting  $k_{occlusion}$ ,  $k_{occupy}$ , and  $\Omega$  to zero.

406 Finally, consider that the model predicts that transcription interference should occur in tandem promoters,  
 407 either due to occlusion if  $d_{TSS} \leq 35$  occupancy or due to occupancy of the downstream promoter if  $d_{TSS} >$   
 408 35. Meanwhile, in single promoters, neither of these phenomena occurs. Thus, on average, two single  
 409 promoters should produce more RNA and proteins than a pair of tandem promoters of similar strength.  
 410 Using the genome wide data from [28] on protein expression levels during exponential growth we estimated  
 411 the double of the mean expression level (it equals 183.8) of genes controlled by single promoters (section  
 412 'Selection of natural genes controlled by single promoters' in the S1 Appendix). Meanwhile, also using data  
 413 from [28], the mean expression level of genes controlled by tandem promoters equals 148 (estimated from  
 414 the 26 that they have reported on), in agreement with the hypothesis. Nevertheless, this data is subject to  
 415 external variables (e.g., TF interference). A definitive test would require the use of synthetic constructs,  
 416 lesser affected by external influences.

## 417 Regulatory parameters of promoter occupancy and 418 occlusion

419 Since the occupancy,  $\omega$ , of each of the tandem promoters is responsible for transcriptional interference by  
 420 occlusion and by RNAPs occupying the downstream promoter, we next explored the biophysical limits of  
 421  $\omega$ . Eqs. 6a and 6b define the occupancies of the upstream and downstream promoters,  $\omega_u$  and  $\omega_d$ ,

422 respectively. For simplicity, here we refer to both of them as  $\omega$ . Fig. 8A shows that  $\omega$  increases with the  
 423 rate of RNAP binding ( $k_{bind} \cdot [R]$ ), but only within a certain range of (high) values of the time from binding  
 424 to elongating ( $k_{after}^{-1}$ ). I.e., RNAPs need to spend a significant time in OC, if they are to cause interference,  
 425 which is expected. Similarly,  $\omega$  changes with  $k_{after}^{-1}$ , but only for high values of  $k_{bind} \cdot [R]$ . I.e., if it's rare  
 426 for RNAPs to bind, the occupancy will necessarily be weak.

427 In detail, from Fig. 8A,  $\omega$  can change significantly within  $10^{-2} < k_{bind} \cdot [R] < 10 \text{ s}^{-1}$  and  $10^{-2} < k_{after}^{-1} < 10^2 \text{ s}^{-1}$ .  
 428 For these ranges, we expect RNA production rates ( $k_r$ , equations 5a, 5b, 6b, 7 and 9) to vary from  $\sim 10^{-5}$  (if  
 429  $d_{TSS} \leq 35$ ) and  $\sim 10^{-4}$  (if  $d_{TSS} > 35$ ) until  $10 \text{ s}^{-1}$ . In agreement, in *E. coli*, promoters have RNA production rates  
 430 from  $\sim 10^{-3}$  to  $10^{-1} \text{ s}^{-1}$  when induced [20-21, 39, 51-52] and  $\sim 10^{-4}$  to  $10^{-6} \text{ s}^{-1}$  when non-fully active [28]. Thus,  
 431  $\omega$  can differ within realistic intervals of parameter values.

432 Next, we estimated  $k_{occlusion}$ , the rate at which a promoter occludes the other as a function of  $d_{TSS}$  and  $\omega$   
 433 using Equations 6a and 6b.  $k^{max}$  is shown in Table 3. To model  $l(d_{TSS})$  we used the step function in Table  
 434 1. Overall,  $k_{occlusion}$  changes linearly with  $\omega$ , when and only when  $d_{TSS} \leq 35$  (Fig. 8B).

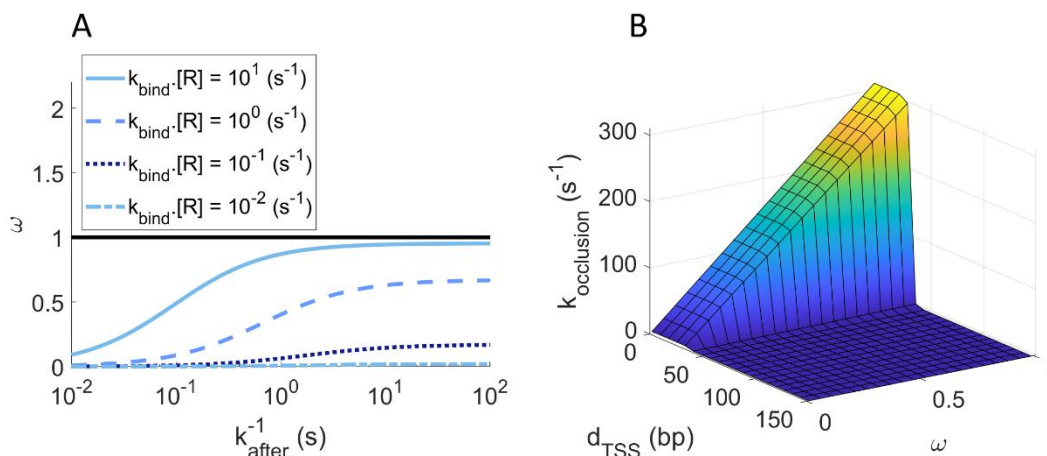

435  
 436 **Fig 8. Promoter occupancy  $\omega$  estimated for the step model.** (A)  $\omega$  as a function of the rate constant  
 437 for a *free* RNAP to bind to the *unoccupied* promoter ( $k_{bind} \cdot [R]$ ) and of the time for that RNAP to start  
 438 elongation after commitment to OC,  $k_{after}^{-1}$ . The horizontal black line at  $\omega = 1$ , is the maximum fraction of  
 439 time that the promoter can be occupied (i.e., the maximum promoter occupancy). (B)  $k_{occlusion}$  plotted as a

440 function of  $\omega$  and  $d_{TSS}$ . Since  $k_{occlusion}$  increases with  $\omega$  if and only if  $d_{TSS} \leq 35$ , it renders the simultaneous  
441 occupation of both TSS's impossible.

442

## 443 **State space of the single cell statistics of protein numbers of** 444 **tandem promoters**

445 We next studied how much the single-cell statistics of protein numbers ( $M_P$ ,  $CV_P^2$ , and  $S_P$ ) of the upstream,  
446 'u', and downstream, 'd', promoters changes with  $\omega_u$ ,  $\omega_d$ , and  $d_{TSS}$ . Here,  $\omega_u$  and  $\omega_d$  are increased from  
447 0 to 1 by increasing the respective  $k_{bind}$  (Eqs. 6a and 6b).

448 From Fig. 9A, if  $d_{TSS} \leq 35$  bp, reducing  $\omega_d$  while also increasing  $\omega_u$  is the most effective way to increase  
449  $M_u$ , since this increases the number of RNAPs transcribing from the upstream promoter that are not  
450 hindered by RNAPs occupying the downstream promoter. If  $d_{TSS} > 35$  bp, the occupancy the downstream  
451 promoter,  $\omega_d$ , becomes ineffective.

452 Oppositely, from Fig. 9B, if  $d_{TSS} \leq 35$  bp, increasing  $\omega_d$  while also decreasing  $\omega_u$ , is the most effective way  
453 to increase  $M_d$  since this increases the number of RNAPs transcribing from the downstream promoter does  
454 not interfere by RNAPs elongating from the upstream promoter. If  $d_{TSS} > 35$  bp, the occupancy the upstream  
455 promoter,  $\omega_u$ , becomes ineffective.

456 Finally, from Fig. 9C, regardless of  $d_{TSS}$ , for small  $\omega_d$  and  $\omega_u$ , as the occupancies increase,  $M_t$  increases  
457 quickly and in a non-linear fashion. However, as both  $\omega_d$  and  $\omega_u$  reach high values,  $M_t$  decreases for  
458 further increases, if  $d_{TSS} \leq 35$  bp. Instead, if  $d_{TSS} > 35$  bp,  $M_t$  appears to saturate.

459 From Figs. S16 in the S2 Appendix,  $CV_P^2$  and  $S_P$  behave inversely to  $M_P$ .

460 Relevantly, in all cases, the range of predicted protein numbers (Fig. 9C1) are in line with the empirical  
461 values ( $\sim 10^{-1}$  to  $10^3$  proteins per cell) (Fig. 4D).

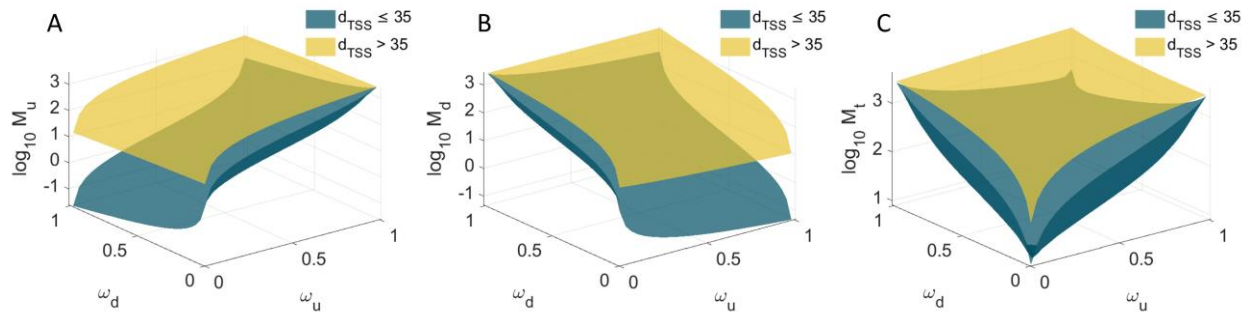

462

463 **Fig 9. Mean protein expression as a function of both promoters' occupancy.** Expected mean protein  
 464 numbers due to the activity of: (A) the upstream promoter alone, (B) the downstream promoter alone, and  
 465 (C) both promoters.  $M_P$  is shown as a function of the fraction of times that the upstream ( $0 \leq \omega_u \leq 1$ ) and  
 466 the downstream ( $0 \leq \omega_d \leq 1$ ) promoters are occupied by RNAP, when  $d_{TSS} > 35$  (yellow) and  $d_{TSS} \leq 35$   
 467 (dark green) bp.

## 468 Discussion

469 *E. coli* genes controlled by tandem promoters have a relatively high mean conservation level (0.2, while the  
 470 average gene has 0.15, with a p-value of 0.009), suggesting that they play particularly relevant biological  
 471 roles (section 'Gene Conservation' in the S1 Appendix). From empirical data on single-cell protein numbers  
 472 of 30 *E. coli* genes controlled by tandem promoters, we found evidence that their dynamics is subject to  
 473 RNAP interference between the two promoters. This interference reduces the mean single-cell protein  
 474 numbers, while increasing its  $CV^2$  and skewness, and can be tuned by  $\omega$ , the promoters' occupancy by  
 475 RNAP, and by  $d_{TSS}$ . Since both of these parameters are sequence dependent [21, 31] the interference  
 476 should be evolvable. Further, since  $\omega$  of at least some of these genes should be under the influence of  
 477 their several input TFs, the interference has the potential to be adaptive.

478 We proposed models of the dynamics of these genes as a function of  $\omega$  and  $d_{TSS}$ , using empirically  
 479 validated parameter values. In our best fitting model, transcription interference is modelled by a step  
 480 function of  $d_{TSS}$  (instead of gradually changing with  $d_{TSS}$ ), since the only detectable differences in dynamics  
 481 with changing  $d_{TSS}$  were between tandem promoters with  $d_{TSS} \leq 35$  and  $d_{TSS} > 35$  nucleotides (the latter  
 482 cohort of genes having higher mean expression and lower variability). We expect that causes this difference  
 483 tangible is the existence of the OC formation. In detail, the OC is a long-lasting DNA-RNAP formation that  
 484 occupies that strict region of DNA at the promoter region [24, 31]. As such, occlusion should share these  
 485 physical features. Because of that, when  $d_{TSS} \leq 35$ , an RNAP bound to TSS always occludes the other  
 486 TSS, significantly reducing RNA production. Meanwhile, if  $d_{TSS} > 35$ , interference occurs when an RNAP  
 487 elongating from the upstream promoter is obstructed by an RNAP occupying the downstream promoter.

488 Meanwhile, contrary to  $d_{TSS}$ , if one considers realistic ranges of the other model parameters, it is possible  
489 to predict a very broad range of accessible dynamics for tandem promoter arrangements. This could explain  
490 the observed diversity of single-cell protein numbers as a function of  $d_{TSS}$  (Fig 6). At the evolutionary level,  
491 such potentially high range of dynamics may provide high evolutionary adaptability and thus, it may be one  
492 reason why genes controlled by these promoters are relatively more conserved.

493 One potentially confounding effect which was not accounted for in this model is the accumulation of  
494 supercoiling. Closely spaced promoters may be more sensitive to supercoiling buildup than single  
495 promoters [53-55]. If so, it will be useful to extend the model to include these effects [26]. Using such model  
496 and measurements of expression by tandem promoters when subject to, e.g. Novobiocin [56], may be of  
497 use to infer kinetic parameters of promoter locking due to positive supercoiling build-up.

498 Other potential improvements could be expanding the model to tandem arrangements other than I and II  
499 (Fig 1), to include a third form of interference (transcription elongation of a nearby gene).

500 One open question is whether placing promoters in tandem formation increases the robustness of  
501 downstream gene expression to perturbations (e.g., fluctuations in the concentrations of RNAP or TF  
502 regulators). A tandem arrangement likely increases the robustness to perturbations which only influence  
503 one of the promoters. Another open question is why several of the 102 tandem promoters with  
504 arrangements I and II appeared to behave independently from their input TFs (according to the RNA-seq  
505 data), albeit having more input TFs (1.62 on average) than expected by chance (the average *E. coli* gene  
506 only has 0.95). As noted above, we hypothesize that these input TFs may become influential in conditions  
507 other than the ones studied here.

508 Here, we also did not consider any influence from the phenomenon of “RNAP cooperation” [57]. This is  
509 based on this being an occurrence in elongation, and we expect interactions between two *elongating*  
510 RNAPs to rarely affect the interference between tandem promoters [9]. However, potentially, it could be of  
511 relevance in the strongest tandem promoters.

512 Finally, a valuable future study on tandem promoters will require the use of synthetic tandem promoters  
513 (integrated in a specific chromosome location) that systematically differ in promoter strengths and  
514 nucleotide distances. This would allow extracting parameter values associated to promoter interference to  
515 create a more precise model than the one based on the natural promoters (which is influenced by TFs, etc).  
516 Similarly, measuring the strength of individual natural promoters would contribute to this effort.

517 Overall, our model, based on a significant number of natural tandem promoters whose genes have a wide  
518 range of expression levels, should be applicable to the natural tandem promoters not observed here (at  
519 least of arrangements I and II), including of other bacteria, and to be accurate in predicting the dynamics of  
520 synthetic promoters in these arrangements.



521 Currently, predicting how gene expression kinetics change with the promoter sequence remains  
522 challenging. Even single- or double-point mutants of known promoters behave unpredictably, likely because  
523 the individual sequence elements influence the OC and CC in a combinatorial fashion. Consequently, the  
524 present design of synthetic circuits is usually limited to the use of a few promoters whose dynamics have  
525 been extensively characterized (Lac, Tet, etc.). This severely limits present synthetic engineering.

526 We suggest that a promising methodology to create new synthetic genes with a wide range of predictable  
527 dynamics is to assemble well-characterized promoters in a tandem formation, and to tune their target  
528 dynamics using our model. Specifically, for a given dynamics, it is possible to invert the model and find a  
529 suitable pair of promoters with known occupancies and corresponding  $d_{TSS}$  (smaller or larger than 35),  
530 which achieve these dynamics. A similar strategy was recently proposed in order to achieve strong  
531 expression levels [58]. Our results agree and further expand on this by showing that the mean expression  
532 level can also be reduced and expression variability can further be fine-tuned.

533 Importantly, this can already be executed, e.g., using a library of individual genes whose expression can  
534 be measured [28]. From this library, we can select any two promoters of interest and arrange them as  
535 presented here, in order to obtain a kinetics of expression as close as possible to a given target. Note that  
536 these dynamics have a wide range, from weaker to stronger than that of either promoter (albeit no stronger  
537 than their sum, Fig 9C1-C3). Given the number of natural genes whose expression is already known and  
538 given the present accuracy in assembling specific nucleotide sequences, we expect this method to allow  
539 the rapid engineering of genes with desired dynamics with an enormous range of possible behaviours. As  
540 such, these constructs could represent a recipe book for the components of gene circuits with predictable  
541 complex kinetics.

## 542 **Materials and Methods**

543 Using information from RegulonDB v10.5 as of 30<sup>th</sup> of January 2020, we started by searching natural genes  
544 controlled by two promoters (Section ‘Selection of natural genes controlled by tandem promoters’ in the S1  
545 Appendix). Next, we studied their evolutionary conservation and ontology (Sections ‘Gene conservation’  
546 and ‘Gene Ontology’ in the S1 Appendix) and analysed their local topological features within the TFN of *E.*  
547 *coli* (Section ‘Network topological properties’ in the S1 Appendix).

548 RNA-seq measurements were conducted in two points in time (Section ‘RNA-seq measurements and data  
549 analysis’ in the S1 Appendix), to obtain fold changes in RNA numbers of genes controlled by tandem  
550 promoters with arrangements I and II, their input TFs, and their output genes (Fig 1). We used this data to  
551 search for relationships between input and output genes.

552 Next, a model of gene expression was proposed, and reduced to obtain an analytical solution of the single-  
553 cell protein expression statistics of tandem promoters (Sections ‘Derivation of mean protein expression of

554 the model' and 'Derivation of  $CV^2$  and skewness of protein expression of the model' in the S1 Appendix).  
555 This analytical solution was compared to stochastic simulations conducted using the simulator SGNS2.  
556 (Section 'Stochastic simulations for the step inference model' in the S1 Appendix).

557 We collected single-cell flow-cytometry measurements of 30 natural genes controlled by tandem promoters  
558 (Section 'Flow-cytometry and data analysis' in the S1 Appendix) to validate the model. For this, first, from  
559 the original data, we subtracted the cellular background fluorescence (Section 'Subtraction of background  
560 fluorescence from the total protein fluorescence' in the S1 Appendix). Then, we converted the fluorescence  
561 intensity into protein numbers (Section 'Conversion of protein fluorescence to protein numbers in the S1  
562 Appendix). From this we obtained empirical data on  $M$ ,  $CV^2$ , and  $S$  of the single-cell distributions of protein  
563 numbers in two media (Sections 'Media and chemicals' and 'Strains and growth conditions' in the S1  
564 Appendix). Flow-cytometry measurements were also compared to microscopy data, supported by image  
565 analysis (Section 'Microscopy and Image analysis' in the S1 Appendix), for validation.

566 Comparing the data from RegulonDB (30.01.2020) used here, with the most recent (21.07.2021), we found  
567 that the numbers of genes controlled by tandem promoters of arrangements I and II differed by ~4% (from  
568 102 to 98). Regarding those whose activity was measured by flow-cytometry, this difference is ~3% (30 to  
569 31). Globally, 163 TF-gene interactions differed (~3.4%) while for the 98 genes controlled by tandem  
570 promoters of arrangements I and II, only 10 TF-gene interactions differ (~2.7%). Finally, globally the  
571 numbers of TUs differed by ~1%, promoters by ~0.6%, genes by ~1%, and terminators by ~15% (which did  
572 not affect the genes studied, as they changed by ~4% only). These small differences should not affect our  
573 conclusions.

574 Finally, a data package [59] is provided in Dryad with flow-cytometry and microscopy data and codes used.

## 575 **Supporting Information**

576 **S1 Appendix. Extended Methods and Materials.** (PDF)

577 **S2 Appendix. Supporting Figures.** (PDF)

578 **S3 Appendix. Supporting Tables.** (PDF)

579 **S4 Appendix. Supporting Results.** (PDF)

580 **S5 Table. Gene Ontology.** Overrepresentation tests using the PANTHER Classification System. List of  
581 biological processes which are overrepresented using Fisher's exact tests are shown. (Excel)

582 **S6 Table. Protein statistics.** Statistics of single-cell distributions of protein fluorescence of genes  
583 controlled by tandem promoters as measured by flow-cytometry in 1X and 0.5X diluted M9 media  
584 conditions. (Excel)

585 **S7 Table. Protein statistics.** Statistics of single-cell distributions of protein fluorescence of genes  
586 controlled by single promoter as measured by flow-cytometry in 1X M9 media condition. (Excel)

## 587 Acknowledgements

588 The authors thank Jason Lloyd-Price for proof-reading and editing the text. The authors also thank all three  
589 referees for their valuable suggestions.

## 590 References

- 591 1. Herbert M, Kolb A, Buc H. Overlapping promoters and their control in *Escherichia coli*: the gal case.  
592 Proc Natl Acad Sci U S A. 1986;83: 2807–2811. doi:10.1073/pnas.83.9.2807  
593
- 594 2. Beck CF, Warren RA. Divergent promoters, a common form of gene organization. Microbiol Rev.  
595 1988;52: 318–326. doi:10.1128/mr.52.3.318-326.1988  
596
- 597 3. Adachi N, Lieber MR. Bidirectional gene organization: a common architectural feature of the human  
598 genome. Cell. 2002;109: 807–809. doi:10.1016/s0092-8674(02)00758-4  
599
- 600 4. Trinklein ND, Aldred SF, Hartman SJ, Schroeder DI, Otilar RP, Myers RM. An abundance of  
601 bidirectional promoters in the human genome. Genome Res. 2004;14: 62–66.  
602 doi:10.1101/gr.1982804  
603
- 604 5. Shearwin KE, Callen BP, Egan JB. Transcriptional interference--a crash course. Trends Genet.  
605 2005;21: 339–345. doi:10.1016/j.tig.2005.04.009  
606
- 607 6. Prescott EM, Proudfoot NJ. Transcriptional collision between convergent genes in budding yeast.  
608 Proc Natl Acad Sci U S A. 2002;99: 8796–8801. doi:10.1073/pnas.132270899  
609
- 610 7. Korbel JO, Jensen LJ, von Mering C, Bork P. Analysis of genomic context: prediction of functional  
611 associations from conserved bidirectionally transcribed gene pairs. Nat Biotechnol. 2004;22: 911–  
612 917. doi:10.1038/nbt988  
613
- 614 8. Wei W, Xiang H, Tan H. Two tandem promoters to increase gene expression in *Lactococcus lactis*.  
615 Biotechnol Lett. 2002;24: 1669–1672. doi:10.1023/A:1020653417455  
616
- 617 9. Sneppen K, Dodd IB, Shearwin KE, Palmer AC, Schubert RA, Callen BP, et al. A mathematical  
618 model for transcriptional interference by RNA polymerase traffic in *Escherichia coli*. J Mol Biol.  
619 2005;346: 399–409. doi: 10.1016/j.jmb.2004.11.075  
620
- 621 10. Martins L, Mäkelä J, Häkkinen A, Kandhavelu M, Yli-Harja O, Fonseca JM, et al. Dynamics of  
622 transcription of closely spaced promoters in *Escherichia coli*, one event at a time. J Theor Biol.  
623 2012;301: 83–94. doi:10.1016/j.jtbi.2012.02.015  
624
- 625 11. Horowitz H, Platt T. Regulation of transcription from tandem and convergent promoters. Nucleic  
626 Acids Res. 1982;10: 5447–5465. doi:10.1093/nar/10.18.5447  
627

- 628 12. Bordoy AE, Varanasi US, Courtney CM, Chatterjee A. Transcriptional Interference in Convergent  
629 Promoters as a Means for Tunable Gene Expression. *ACS Synth Biol.* 2016;5: 1331–1341.  
630 doi:10.1021/acssynbio.5b00223  
631
- 632 13. Palmer AC, Ahlgren-Berg A, Egan JB, Dodd IB, Shearwin KE. Potent transcriptional interference  
633 by pausing of RNA polymerases over a downstream promoter. *Mol Cell.* 2009;34: 545–555.  
634 doi:10.1016/j.molcel.2009.04.018  
635
- 636 14. Callen BP, Shearwin KE, Egan JB. Transcriptional Interference between Convergent Promoters  
637 Caused by Elongation over the Promoter. *Mol Cell.* 2004;14: 647–656.  
638 doi:10.1016/j.molcel.2004.05.010  
639
- 640 15. Hoffmann SA, Hao N, Shearwin KE, Arndt KM. Characterizing Transcriptional Interference between  
641 Converging Genes in Bacteria. *ACS Synth Biol.* 2019;8: 466–473. doi:10.1021/acssynbio.8b00477  
642
- 643 16. Masulis IS, Babaeva ZS, Chernyshov SV, Ozoline ON. Visualizing the activity of *Escherichia coli*  
644 divergent promoters and probing their dependence on superhelical density using dual-colour  
645 fluorescent reporter vector. *Sci Rep.* 2015;5: 1–10. doi:10.1038/srep11449  
646
- 647 17. Vogl T, Kickenweiz T, Pitzer J, Sturmberger L, Weninger A, Biggs BW, et al. Engineered  
648 bidirectional promoters enable rapid multi-gene co-expression optimization. *Nat Commun.* 2018;9:  
649 1–13. doi:10.1038/s41467-018-05915-w  
650
- 651 18. Adhya S, Gottesman M. Promoter occlusion: Transcription through a promoter may inhibit its  
652 activity. *Cell.* 1982;29: 939–944. doi:10.1016/0092-8674(82)90456-1  
653
- 654 19. Eszterhas SK, Bouhassira EE, Martin DIK, Fiering S. Transcriptional interference by independently  
655 regulated genes occurs in any relative arrangement of the genes and is influenced by chromosomal  
656 integration position. *Mol Cell Biol.* 2002;22: 469–479. doi:10.1128/MCB.22.2.469-479.2002  
657
- 658 20. Lloyd-Price J, Startceva S, Kandavalli V, Chandraseelan JG, Goncalves N, Oliveira SMD, et al.  
659 Dissecting the stochastic transcription initiation process in live *Escherichia coli*. *DNA Res.* 2016;23:  
660 203–214. doi:10.1093/dnares/dsw009  
661
- 662 21. Lutz R, Lozinski T, Ellinger T, Bujard H. Dissecting the functional program of *Escherichia coli*  
663 promoters: the combined mode of action of Lac repressor and AraC activator. *Nucleic Acids Res.*  
664 2001;29: 3873–3881. doi:10.1093/nar/29.18.3873  
665
- 666 22. McClure WR. Rate-limiting steps in RNA chain initiation. *Proc Natl Acad Sci U S A.* 1980;77: 5634–  
667 5638. doi:10.1073/pnas.77.10.5634  
668
- 669 23. Krummel B, Chamberlin MJ. Structural analysis of ternary complexes of *Escherichia coli* RNA  
670 polymerase. Deoxyribonuclease I footprinting of defined complexes. *J Mol Biol.* 1992;225: 239–  
671 250. doi:10.1016/0022-2836(92)90918-a  
672
- 673 24. deHaseth Pieter L., Zupancic Margaret L., Record M. Thomas. RNA Polymerase-Promoter  
674 Interactions: the Comings and Goings of RNA Polymerase. *J Bacteriol.* 1998;180: 3019–3025.  
675 doi:10.1128/JB.180.12.3019-3025.1998  
676
- 677 25. Greive SJ, von Hippel PH. Thinking quantitatively about transcriptional regulation. *Nat Rev Mol Cell*  
678 *Biol.* 2005;6: 221–232. doi:10.1038/nrm1588  
679

- 680 26. Palma CSD, Kandavalli V, Bahrudeen MNM, Minoia M, Chauhan V, Dash S, et al. Dissecting the  
681 in vivo dynamics of transcription locking due to positive supercoiling buildup. *Biochimica et*  
682 *Biophysica Acta (BBA) - Gene Regulatory Mechanisms*. 2020;1863: 194515. doi:  
683 10.1016/j.bbagr.2020.194515  
684
- 685 27. Häkkinen A, Oliveira SMD, Neeli-Venkata R, Ribeiro AS. Transcription closed and open complex  
686 formation coordinate expression of genes with a shared promoter region. *J R Soc Interface*.  
687 2019;16: 20190507. doi:10.1098/rsif.2019.0507  
688
- 689 28. Taniguchi Y, Choi PJ, Li G-W, Chen H, Babu M, Hearn J, et al. Quantifying E. coli Proteome and  
690 Transcriptome with Single-Molecule Sensitivity in Single Cells. *Science*. 2010;329: 533–538.  
691 doi:10.1126/science.1188308  
692
- 693 29. Friedman LJ, Mumm JP, Gelles J. RNA polymerase approaches its promoter without long-range  
694 sliding along DNA. *Proc Natl Acad Sci U S A*. 2013;110: 9740–9745.  
695 doi:10.1073/pnas.1300221110  
696
- 697 30. Skinner GM, Baumann CG, Quinn DM, Molloy JE, Hoggett JG. Promoter Binding, Initiation, and  
698 Elongation by Bacteriophage T7 RNA Polymerase: A SINGLE-MOLECULE VIEW OF THE  
699 TRANSCRIPTION CYCLE\*. *J Biol Chem*. 2004;279: 3239–3244. doi:10.1074/jbc.M310471200  
700
- 701 31. McClure WR. Mechanism and control of transcription initiation in prokaryotes. *Annu Rev Biochem*.  
702 1985;54: 171–204. doi:10.1146/annurev.bi.54.070185.001131  
703
- 704 32. Saecker RM, Record MT Jr, Dehaseth PL. Mechanism of bacterial transcription initiation: RNA  
705 polymerase - promoter binding, isomerization to initiation-competent open complexes, and initiation  
706 of RNA synthesis. *J Mol Biol*. 2011;412: 754–771. doi:10.1016/j.jmb.2011.01.018  
707
- 708 33. Mekler V, Kortkhonjia E, Mukhopadhyay J, Knight J, Revyakin A, Kapanidis AN, et al. Structural  
709 Organization of Bacterial RNA Polymerase Holoenzyme and the RNA Polymerase-Promoter Open  
710 Complex. *Cell*. 2002;108: 599–614. doi:10.1016/S0092-8674(02)00667-0  
711
- 712 34. Margeat E, Kapanidis AN, Tinnefeld P, Wang Y, Mukhopadhyay J, Ebricht RH, et al. Direct  
713 Observation of Abortive Initiation and Promoter Escape within Single Immobilized Transcription  
714 Complexes. *Biophys J*. 2006;90: 1419–1431. doi:10.1529/biophysj.105.069252  
715
- 716 35. Hsu LM. Promoter clearance and escape in prokaryotes. *Biochim Biophys Acta*. 2002;1577: 191–  
717 207. doi:10.1016/s0167-4781(02)00452-9  
718
- 719 36. Hsu LM. Promoter Escape by Escherichia coli RNA Polymerase. *EcoSal Plus*. 2008;3.  
720 doi:10.1128/ecosalplus.4.5.2.2  
721
- 722 37. Henderson KL, Felth LC, Molzahn CM, Shkel I, Wang S, Chhabra M, et al. Mechanism of  
723 transcription initiation and promoter escape by E. coli RNA polymerase. *Proc Natl Acad Sci U S A*.  
724 2017;114: E3032–E3040. doi:10.1073/pnas.1618675114  
725
- 726 38. Ponnambalam S, Busby S. RNA polymerase molecules initiating transcription at tandem promoters  
727 can collide and cause premature transcription termination. *FEBS Lett*. 1987;212: 21–27.  
728 doi:10.1016/0014-5793(87)81549-1  
729
- 730 39. Kandavalli VK, Tran H, Ribeiro AS. Effects of  $\sigma$  factor competition are promoter initiation kinetics  
dependent. *Biochim Biophys Acta*. 2016;1859: 1281–1288. doi: 10.1016/j.bbagr.2016.07.011

- 731  
732 40. Bremer H, Dennis P, Ehrenberg M. Free RNA polymerase and modeling global transcription in  
733 Escherichia coli. *Biochimie*. 2003;85: 597–609. doi:10.1016/S0300-9084(03)00105-6  
734  
735 41. Patrick M, Dennis PP, Ehrenberg M, Bremer H. Free RNA polymerase in Escherichia coli.  
736 *Biochimie*. 2015;119: 80–91. doi:10.1016/j.biochi.2015.10.015  
737  
738 42. Ju X, Li D, Liu S. Full-length RNA profiling reveals pervasive bidirectional transcription terminators  
739 in bacteria. *Nat Microbiol*. 2019;4: 1907–1918. doi:10.1038/s41564-019-0500-z  
740  
741  
742 43. Santos-Zavaleta A, Salgado H, Gama-Castro S, Sánchez-Pérez M, Gómez-Romero L, Ledezma-  
743 Tejeida D, et al. RegulonDB v 10.5: tackling challenges to unify classic and high throughput  
744 knowledge of gene regulation in E. coli K-12. *Nucleic Acids Res*. 2019;47: D212–D220.  
745 doi:10.1093/nar/gky1077  
746  
747 44. Bar-Even A, Paulsson J, Maheshri N, Carmi M, O’Shea E, Pilpel Y, et al. Noise in protein  
748 expression scales with natural protein abundance. *Nat Genet*. 2006;38: 636–643.  
749 doi:10.1038/ng1807  
750  
751 45. Hausser J, Mayo A, Keren L, Alon U. Central dogma rates and the trade-off between precision and  
752 economy in gene expression. *Nat Commun*. 2019;10: 1–15. doi:10.1038/s41467-018-07391-8  
753  
754 46. Lagarias JC, Reeds JA, Wright MH, Wright PE. Convergence Properties of the Nelder--Mead  
755 Simplex Method in Low Dimensions. *SIAM J Optim*. 1998;9: 112–147.  
756 doi:10.1137/S1052623496303470  
757  
758 47. Maurizi MR. Proteases and protein degradation in Escherichia coli. *Experientia*. 1992;48: 178–201.  
759 doi:10.1007/BF01923511  
760  
761 48. Koch AL, Levy HR. Protein turnover in growing cultures of Escherichia coli. *J Biol Chem*. 1955;217:  
762 947–957. Available: <https://www.ncbi.nlm.nih.gov/pubmed/13271454>  
763  
764 49. Rydenfelt M, Garcia HG, Cox RS 3rd, Phillips R. The influence of promoter architectures and  
765 regulatory motifs on gene expression in Escherichia coli. *PLoS One*. 2014;9: e114347.  
766 doi:10.1371/journal.pone.0114347  
767  
768 50. Buchler NE, Gerland U, Hwa T. On schemes of combinatorial transcription logic. *Proc Natl Acad*  
769 *Sci U S A*. 2003;100: 5136–5141. doi:10.1073/pnas.0930314100  
770  
771 51. Golding I, Paulsson J, Zawilski SM, Cox EC. Real-Time Kinetics of Gene Activity in Individual  
772 Bacteria. *Cell*. 2005;123: 1025–1036. doi:10.1016/j.cell.2005.09.031  
773  
774 52. Startceva S, Kandavalli VK, Visa A, Ribeiro AS. Regulation of asymmetries in the kinetics and  
775 protein numbers of bacterial gene expression. *Biochimica et Biophysica Acta (BBA) - Gene*  
776 *Regulatory Mechanisms*. 2019;1862: 119–128. doi:10.1016/j.bbagr.2018.12.005  
777  
778 53. Rhee KY, Opel M, Ito E, Hung S p., Arfin SM, Hatfield GW. Transcriptional coupling between the  
779 divergent promoters of a prototypic LysR-type regulatory system, the *ilvYC* operon of Escherichia  
780 coli. *Proc Natl Acad Sci U S A*. 1999;96: 14294–14299. doi:10.1073/pnas.96.25.14294  
781

- 782 54. Jia J, King JE, Goldrick MC, Aldawood E, Roberts IS. Three tandem promoters, together with IHF,  
783 regulate growth phase dependent expression of the Escherichia coli kps capsule gene cluster. Sci  
784 Rep. 2017;7: 1–11. doi:10.1038/s41598-017-17891-0  
785
- 786 55. Yeung E, Dy AJ, Martin KB, Ng AH, Del Vecchio D, Beck JL, et al. Biophysical Constraints Arising  
787 from Compositional Context in Synthetic Gene Networks. Cell Syst. 2017;5: 11-24.e12.  
788 doi:10.1016/j.cels.2017.06.001  
789
- 790 56. Chong S, Chen C, Ge H, Xie XS. Mechanism of transcriptional bursting in bacteria. Cell. 2014;158:  
791 314–326. doi:10.1016/j.cell.2014.05.038  
792
- 793 57. Epshtein V, Nudler E. Cooperation between RNA polymerase molecules in transcription  
794 elongation. Science. 2003;300: 801–805. doi:10.1126/science.1083219  
795
- 796 58. Li M, Wang J, Geng Y, Li Y, Wang Q, Liang Q, et al. A strategy of gene overexpression based on  
797 tandem repetitive promoters in Escherichia coli. Microb Cell Fact. 2012;11: 19. doi:10.1186/1475-  
798 2859-11-19  
799
- 800 59. Chauhan V, Bahrudeen MNM, Palma CSD, Ines SCB, Almeida BLB, Dash S, et al. Analytical  
801 kinetic model of native tandem promoters in E. coli, Dryad, Dataset. doi: 10.5061/dryad.bnzs7h4b  
802
